# Supplementary material for: Enzyme-Aided Extraction of Fucoidan by AMG Augments the Functionality of EPCs through Regulation of the AKT/Rheb Signaling Pathway
Source: MDPI journal article supplement (doi:10.3390/md17070392), 2019-07-03
Supplement: s1 [file s1]

(a)

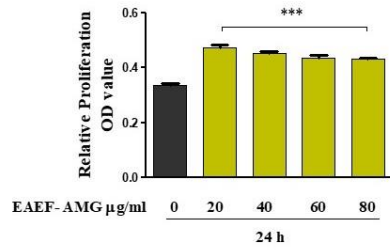

(b)

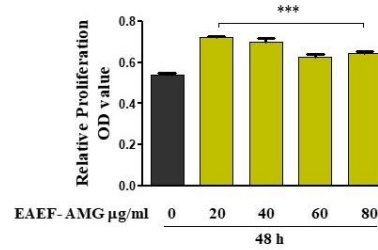

(c)

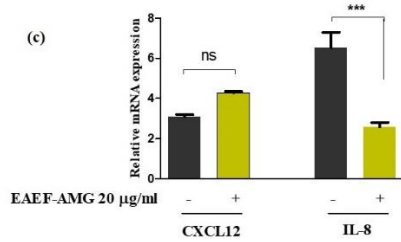

**Supplementary Figure 1.** Enzyme aided extraction of fucoidan by AMG enhances EPC proliferation. (a-b) Enzyme aided extraction of fucoidan by AMG treated with different doses (20, 40, 60, and 80  $\mu\text{g/mL}$ ) for 24 h and 48 h, following which cell proliferation was measured by WST-1. (c) RNA was isolated and relative mRNA levels of CXCL12 and IL-8 between control and 20  $\mu\text{g/mL}$  EAEF-AMG treated cells were determined by qRT-PCR. Data are presented as mean  $\pm$  standard error of the mean (SEM). The results are considered as statistically significant at \* $P < 0.05$ ; \*\* $P < 0.01$ ; \*\*\* $P < 0.001$  when compared to untreated groups.

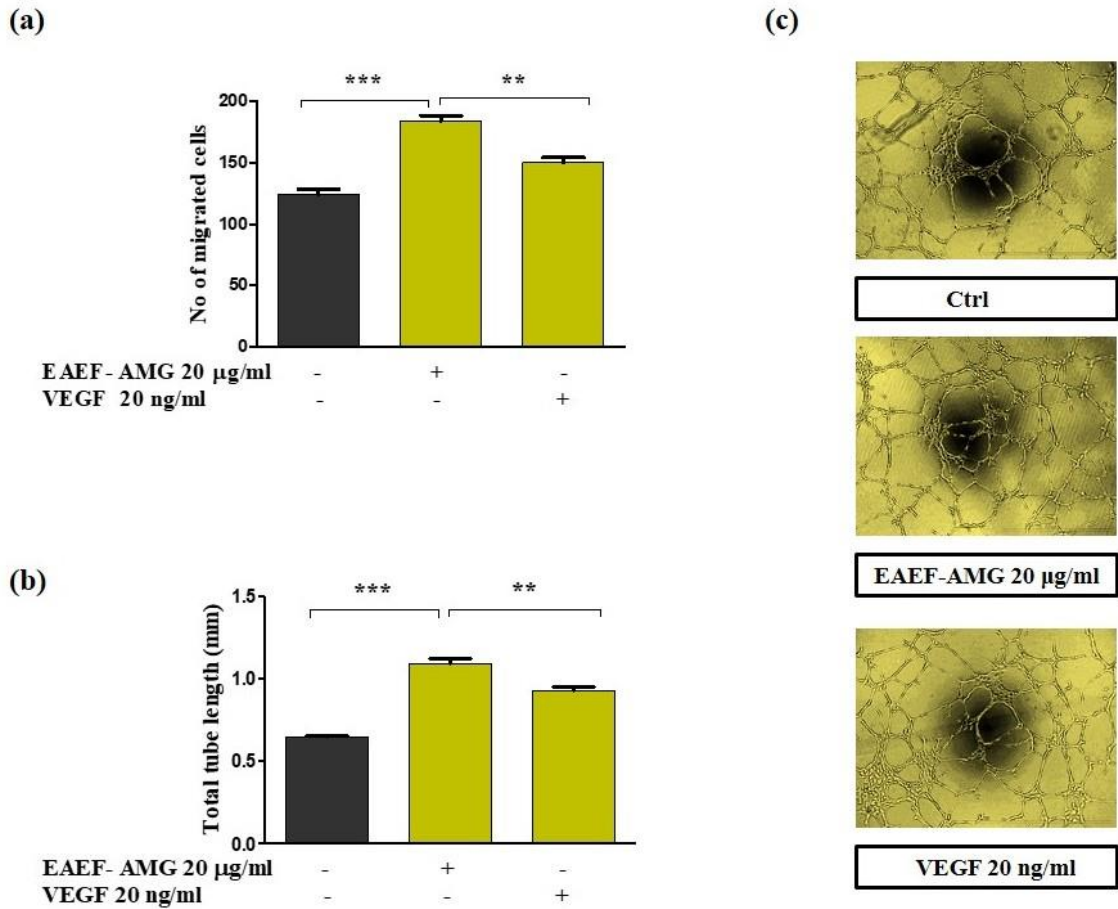

**Supplementary Figure 2.** EAEF-AMG and VEGF enhances angiogenic activity. (a) Cells were treated with EAEF-AMG (20 µg/mL) or VEGF (20 ng/mL) for 6 h, and then capillary structures were acquired using a light microscope (Olympus, Tokyo, Japan). Total tube length and branches were quantified using ImageJ software (NIH, Maryland, USA). Data are presented as mean ± standard error of the mean (SEM). The results are considered as statistically significant at \*P < 0.05; \*\*P < 0.01; \*\*\*P < 0.001 when compared to untreated groups.

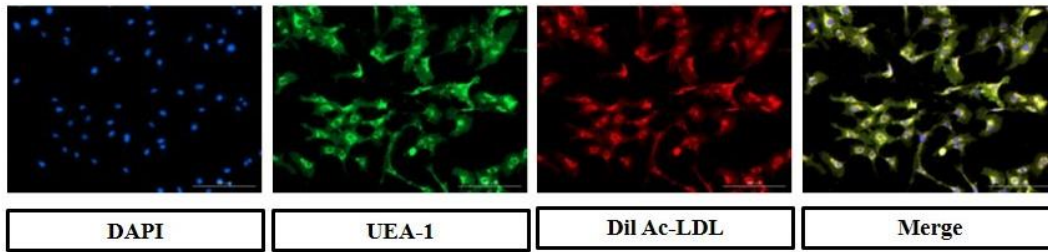

**Supplementary Figure 3.** Characterization of EPCs. EPCs phenotype was confirmed by immunofluorescence, by uptake of Dil acetylated-LDL or binding of fluorescently labeled Ulex- europaeus agglutinin 1 plant lectin
